# Supplementary material
Source: Springer Nature journal article supplement (https://www.springermedizin.de/resource/supplementary/12986_2012_559_MOESM1_ESM.pdf/25655022)

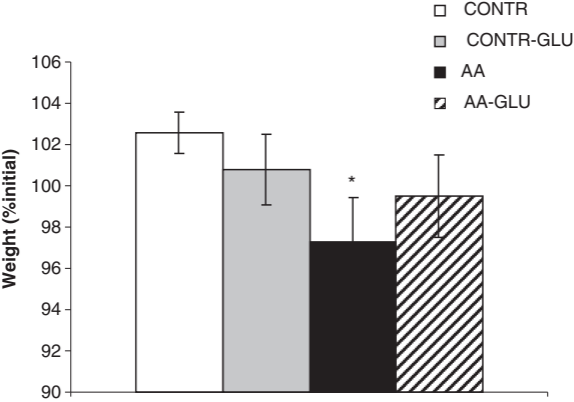

Supplement: MOESM1 [file 25655022]
